# Supplementary material for: Enhancing cycling stability of Li-rich Mn-based cathode materials via cyano functional additives
Source: Royal Society of Chemistry journal article supplement (doi:10.1039/d4qm01070a), 2025-01-01
Supplement: d4qm01070a1.pdf [file d4qm01070a1.pdf]

## Supporting Information

### Enhancing Cycling Stability of Li-Rich Mn-Based Cathode Materials via Cyano Functional Additive

Dongwei Zhou<sup>a</sup>, Zhanlin Yang<sup>b</sup>, Shihao Wang<sup>a</sup>, Guiyang Gao<sup>a</sup>, Jie Zhu<sup>a</sup>, Chengkun Zhang<sup>a</sup>, Saichao Li<sup>a</sup>, Baisheng Sa<sup>b</sup>, Jie Lin<sup>\*,a</sup>, Dong-Liang Peng<sup>\*,a</sup>, Qingshui Xie<sup>\*,a</sup>

<sup>a</sup> State Key Laboratory of Physical Chemistry of Solid Surface, Fujian Key Laboratory of Surface and Interface Engineering for High Performance Materials, College of Materials, Xiamen University, Xiamen 361005, China.

<sup>b</sup> College of Materials Science and Engineering, Fuzhou University, Fuzhou 350108, China.

\* Corresponding authors

E-mail addresses: linjie@xmu.edu.cn (J. Lin), dlpeng@xmu.edu.cn (D.-L. Peng), xieqsh@xmu.edu.cn (Q. Xie).

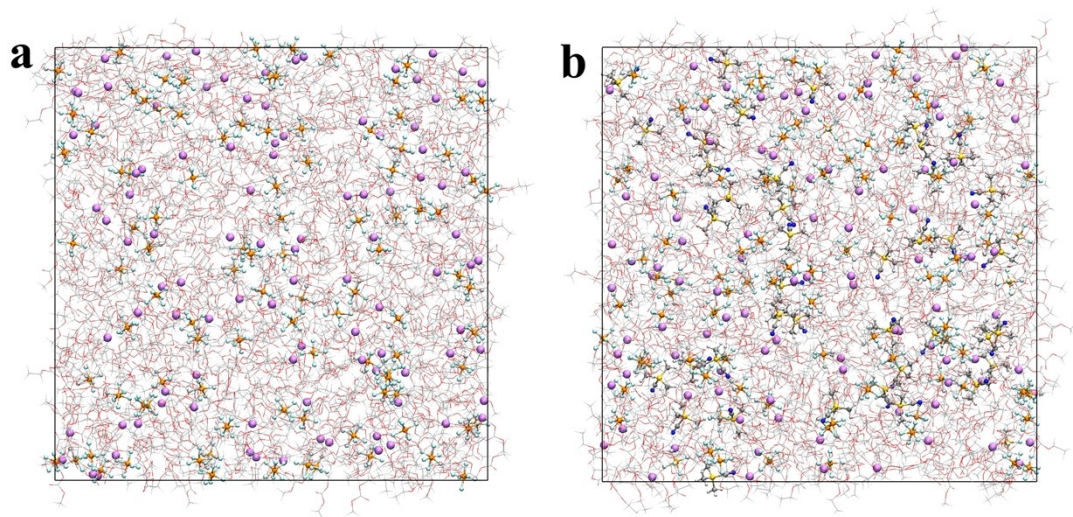

**Fig. S1.** MD simulation snapshots of the (a) baseline and (b) TMS-containing electrolytes.

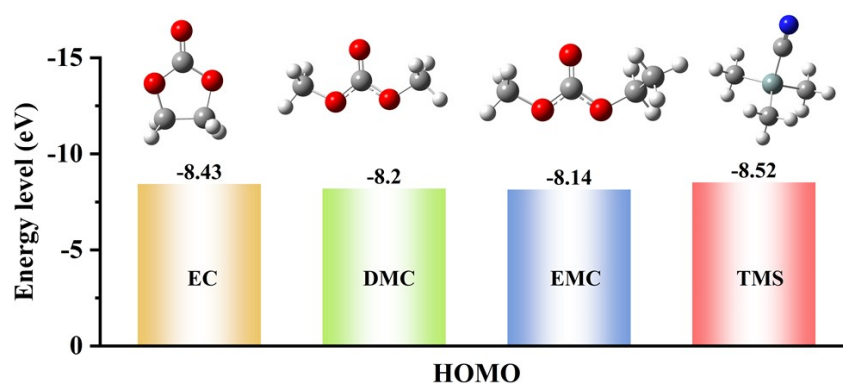

**Fig. S2.** Theoretical calculations of HOMO values for various solvents and additive.

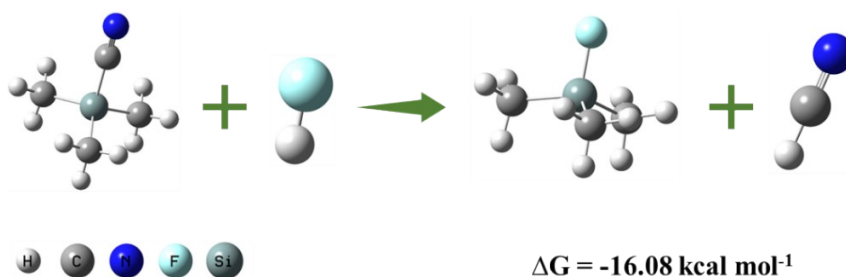

**Fig. S3.** The Gibbs free energy ( $\Delta G$ ) of TMS reacting with HF.

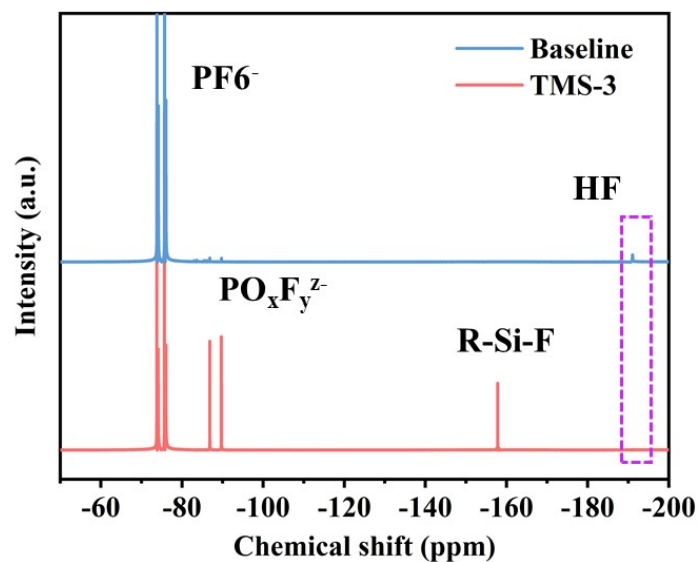

Fig. S4.  $^{19}\text{F}$  NMR spectra of the baseline and TMS-containing electrolytes.

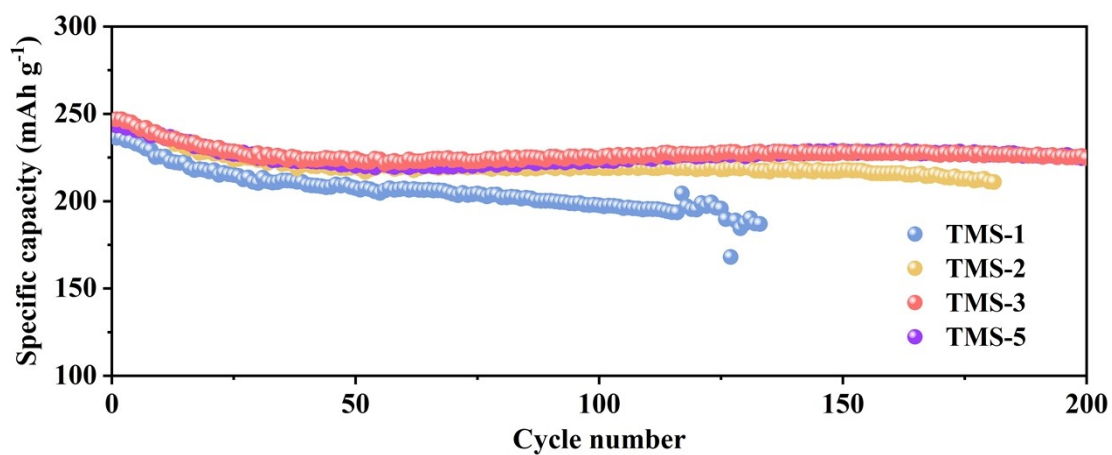

Fig. S5. Cycling performance of Li||LRM batteries in the electrolytes with different contents of TMS at 1 C.

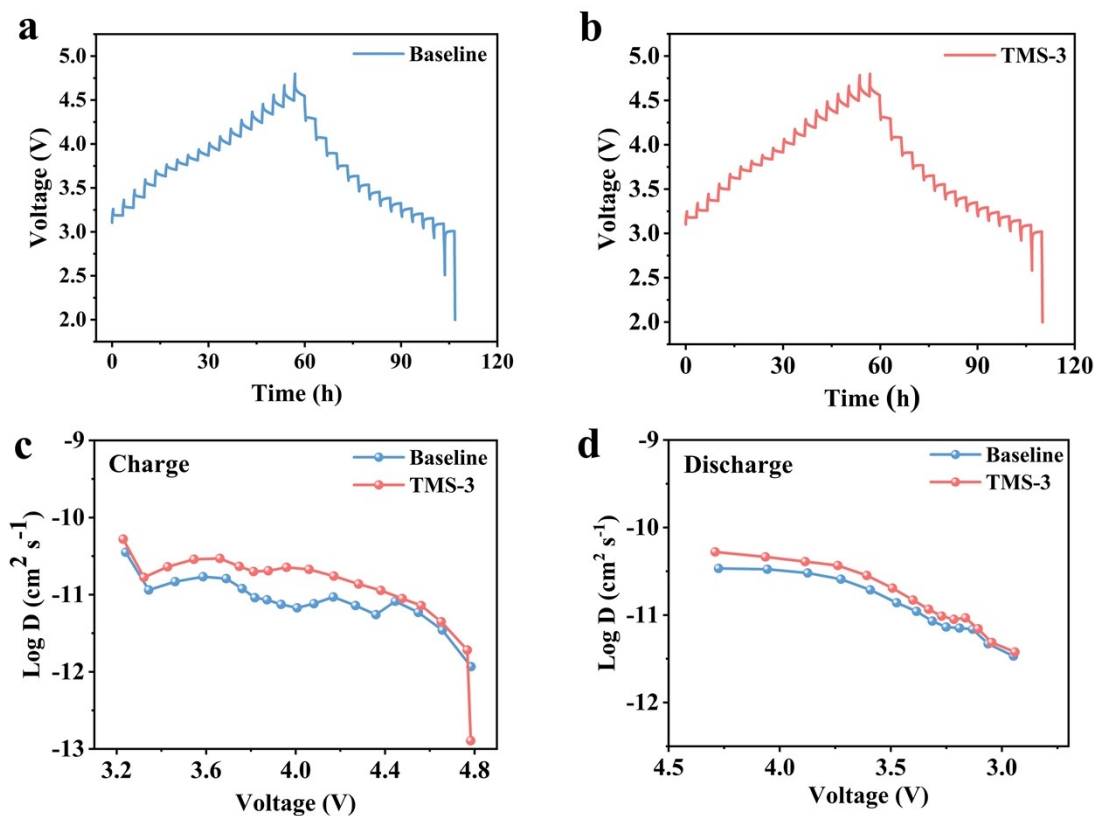

**Fig. S6.** (a, b) GITT curves of Li||LRM batteries (a) without and (b) with TMS additive. (c, d) The calculated  $\text{Li}^+$  diffusion coefficient during (c) charge and (d) discharge process.

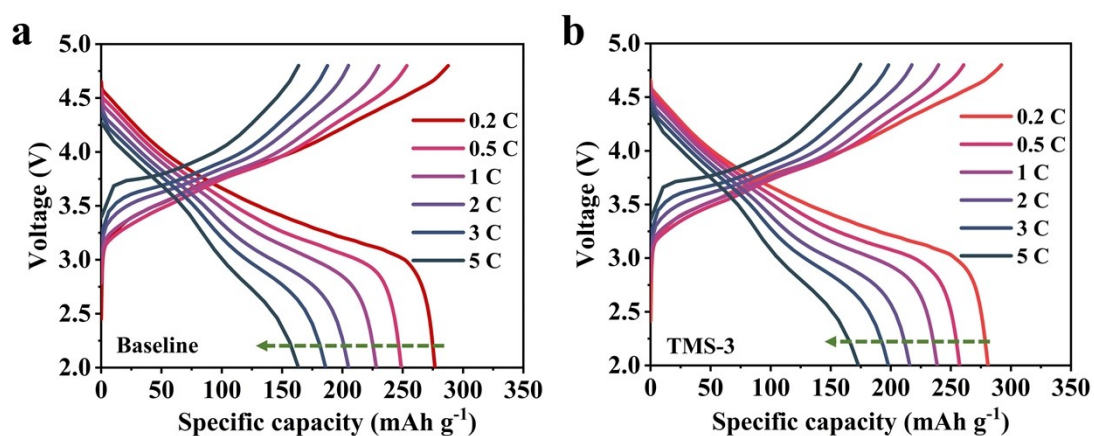

**Fig. S7.** The charge and discharge curves of Li||LRM batteries (a) without and (b) with TMS additive in the rate test.

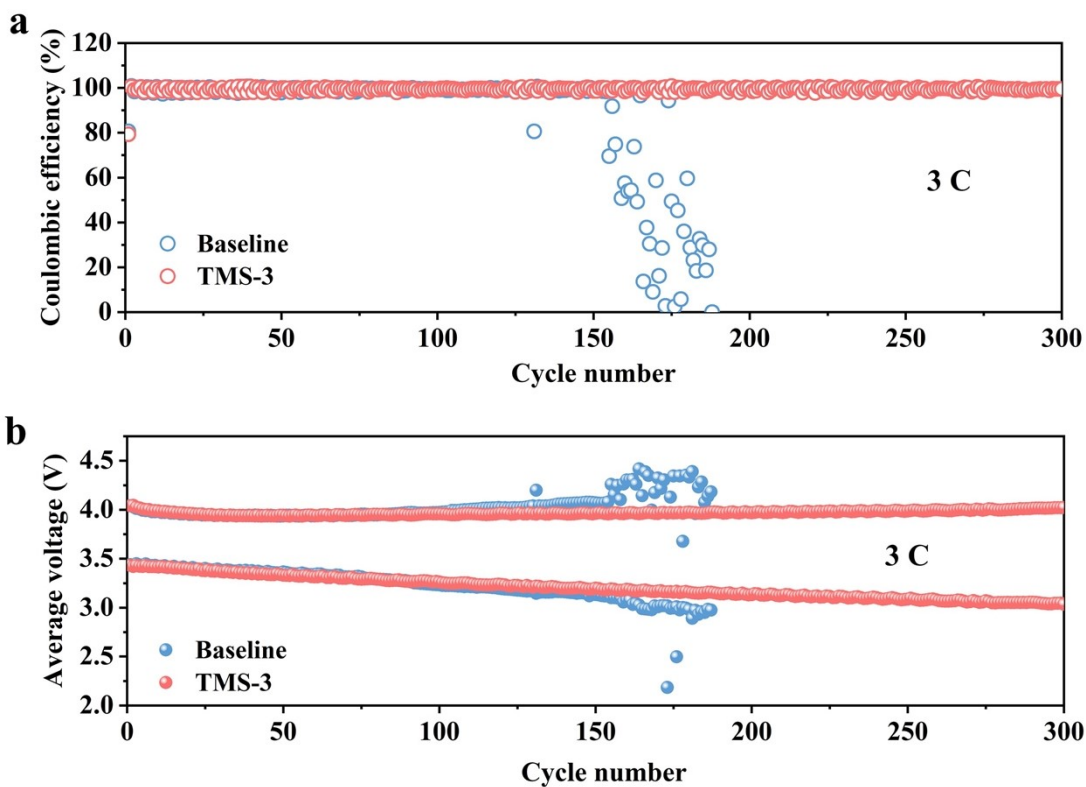

**Fig. S8.** (a) Coulombic efficiency and (b) the corresponding average voltage with different electrolytes at 3 C.

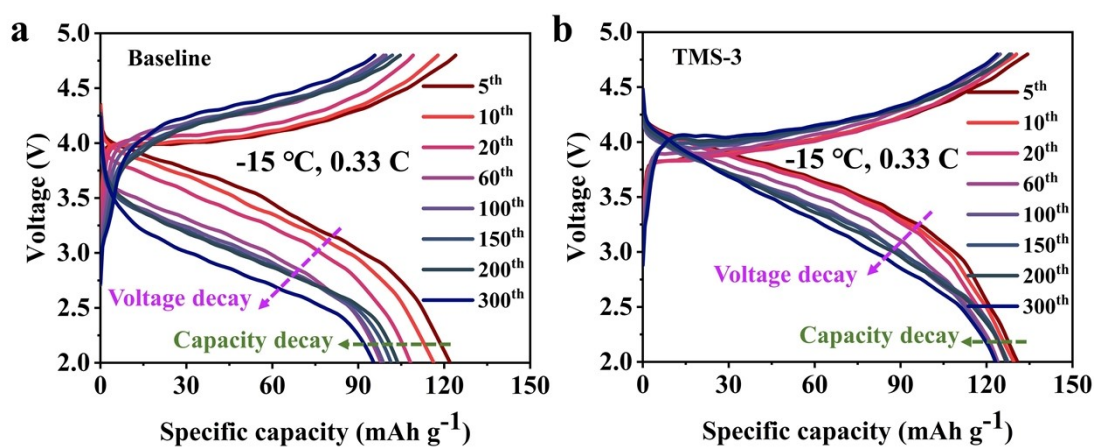

**Fig. S9.** The charge and discharge curves of Li||LRM batteries (a) without and (b) with TMS additive at 0.33 C and -15 °C.

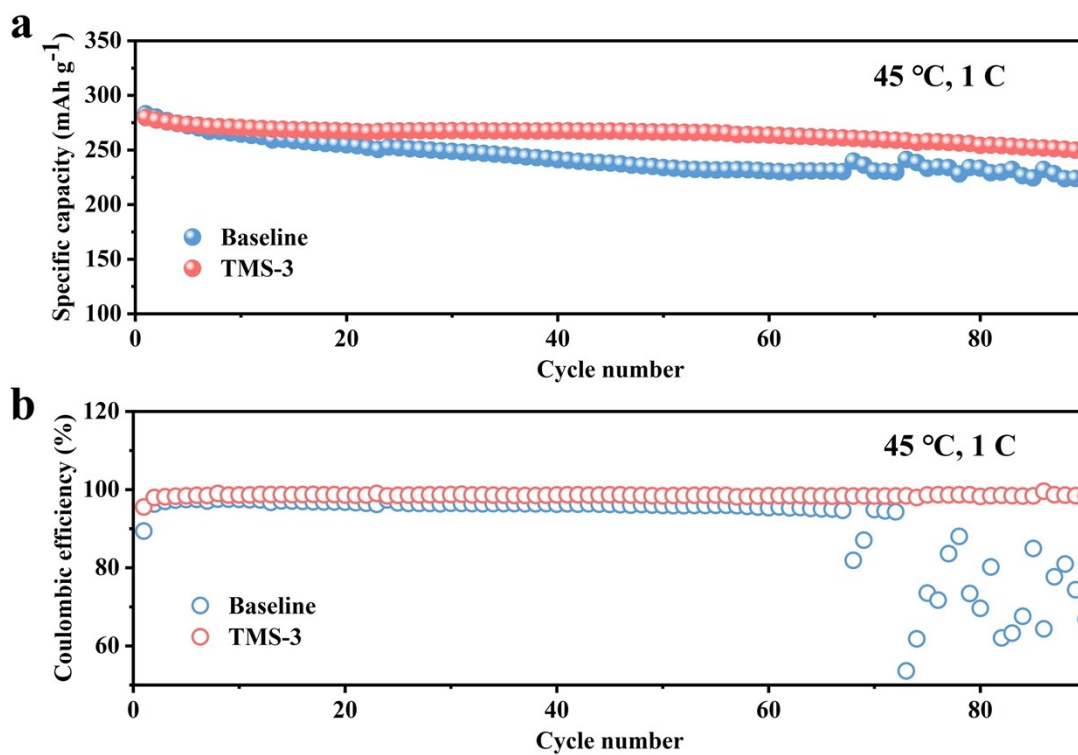

**Fig. S10.** (a) The Cycling performance with different electrolytes at 45 °C and 1 C and (b) the corresponding Coulombic efficiencies.

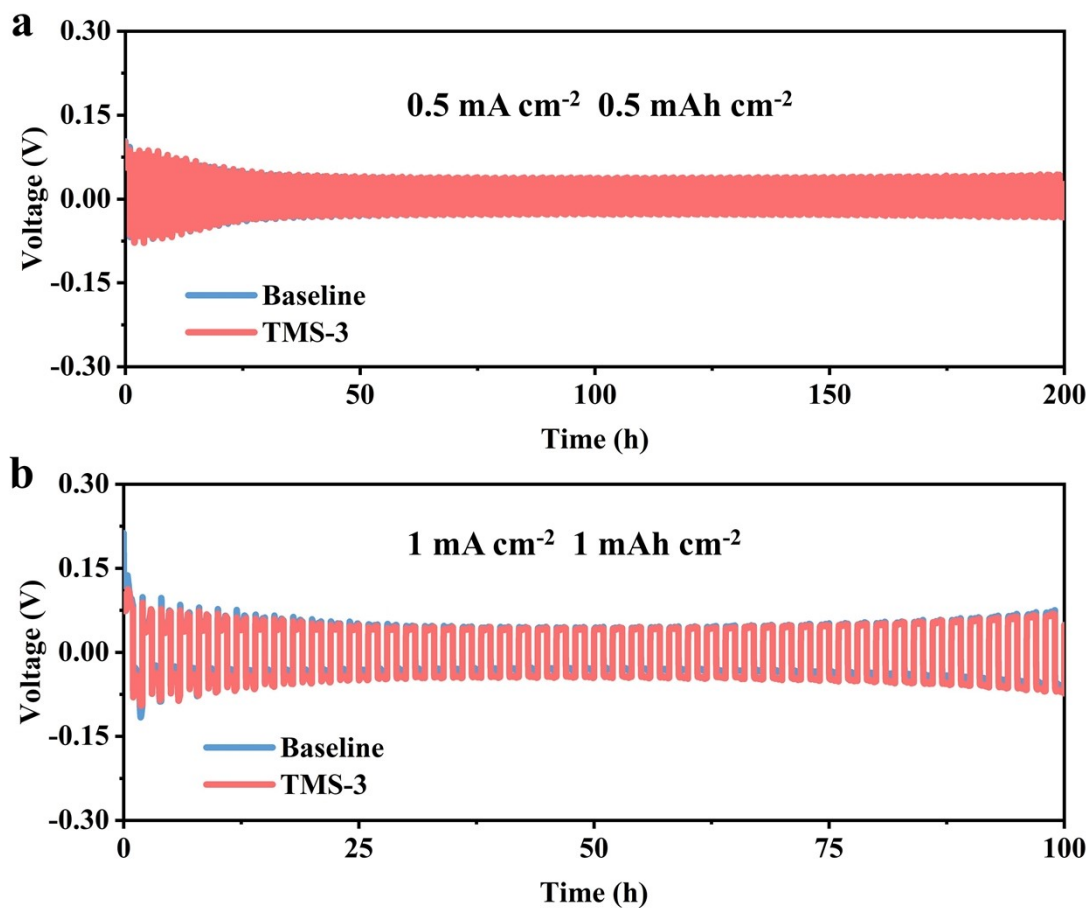

**Fig. S11.** Voltage curves of Li||Li symmetrical batteries with different electrolytes: (a) at  $0.5 \text{ mA cm}^{-2}$  with a capacity of  $0.5 \text{ mAh cm}^{-2}$ , (b) at  $1 \text{ mA cm}^{-2}$  with a capacity of  $1 \text{ mAh cm}^{-2}$ .

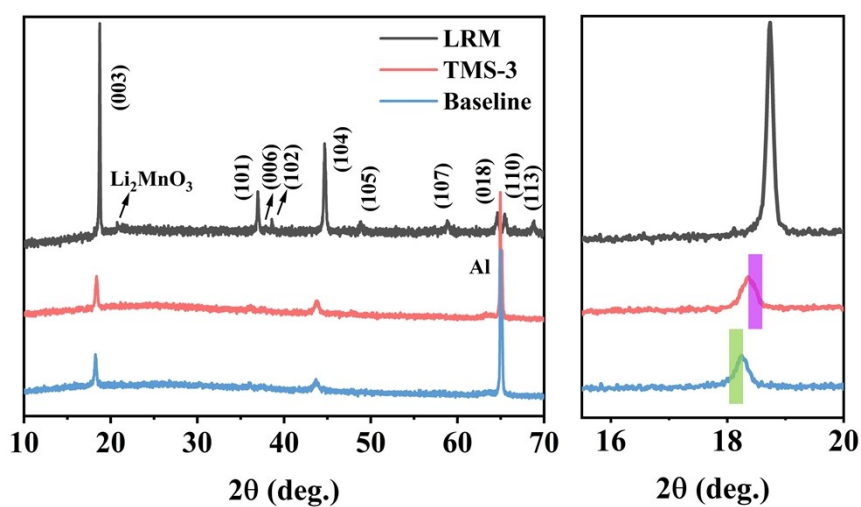

**Fig. S12.** XRD patterns of LRM cathodes without and with TMS additive after 100

cycles.

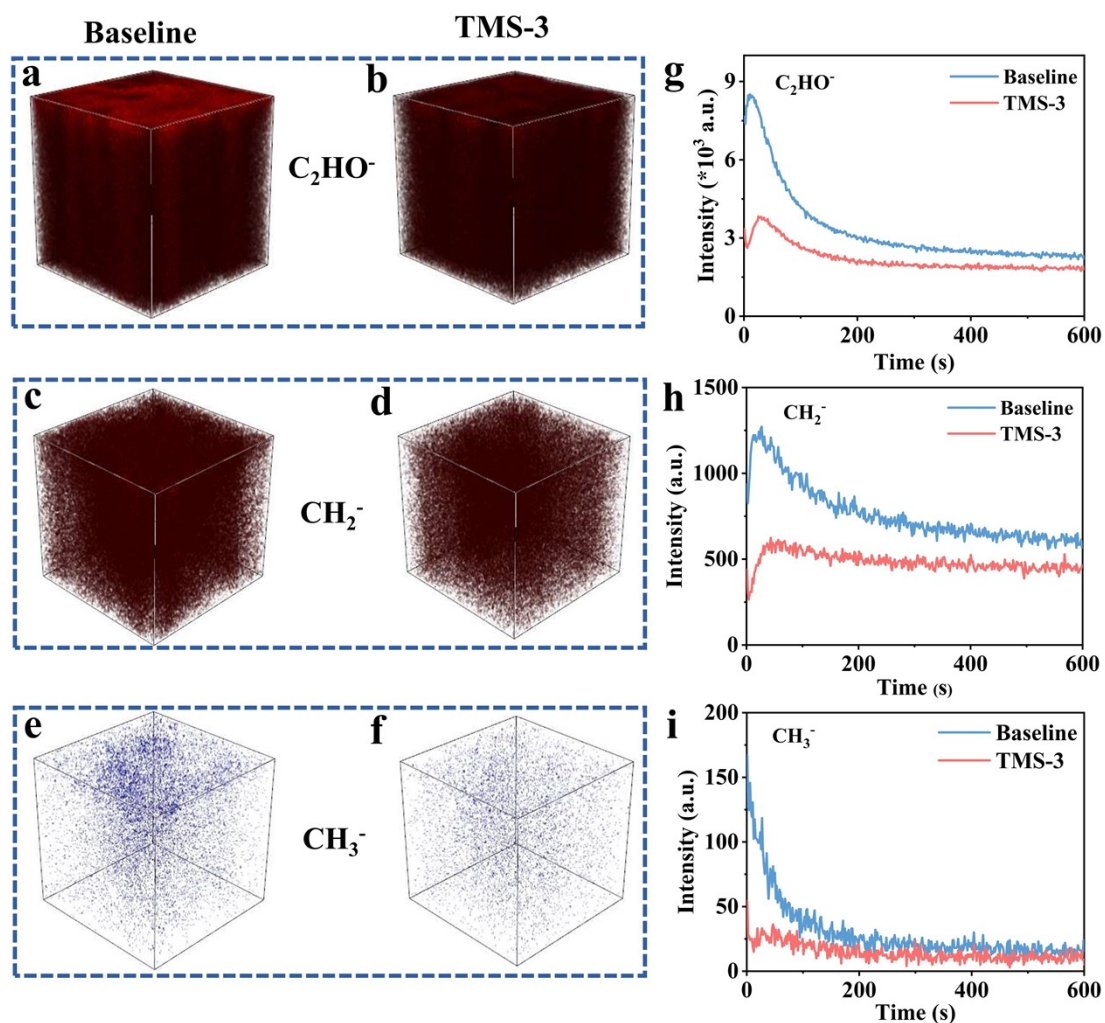

**Fig. S13.** TOF-SIMS 3D render images of fragments on the cycled cathodes with the (a, c, e) baseline and (b, d, f) TMS-3 electrolytes. The corresponding depth curves for (g)  $C_2HO^-$ , (h)  $CH_2^-$ , and (i)  $CH_3^-$  species.
